# Supplementary material for: Interspecies Genomic Variation and Transcriptional Activeness of Secondary Metabolism-Related Genes in Aspergillus Section Fumigati
Source: Front Fungal Biol. 2021 Apr 16;2:656751. doi: 10.3389/ffunb.2021.656751 (PMC10512231; doi:10.3389/ffunb.2021.656751)
Supplement: Supplementary Table 1 — List of SM backbone genes in the nine Aspergillus section Fumigati species. [file Table_1.XLSX]

## Sheet: All SM core genes
Table S1 List of SM backbone genes in Aspergillus section Fumigati species
Type*	A. fumigatus (34)	N. fischeri (46)	A. lentulus (46)	A. udagawae (68)	A. viridinutans (49)	A. pseudoviridinutans (80)	A. fumigatiaffinis (84)	A. novofumigatus (57)	A. thermomutatus (46)	Gene name in Afum (or others)	Presumed or experimentally defined metabolite
NRPS	Afu1g10380	NFIA_015290	Alt_002492-T1	Aud_008518-T1	Avi_006867-T1	Aps_002821-T1	CNMCM6805_007964	P174DRAFT_504080	CDV56_103517	pes1/nrps1	Fumigaclavine C
NRPS	Afu1g17200	NFIA_008170	Alt_001796-T1	Aud_007839-T1	Avi_009095-T1	Aps_002137-T1	CNMCM6805_009571	P174DRAFT_450581	CDV56_103631	sidC	Ferricrocin, hydroxyferricrocin
HR-PKS	Afu2g01290	NFIA_033590	Alt_001560-T1	Aud_000238-T1	Avi_001569-T1	Aps_001519-T1	CNMCM6805_001180	P174DRAFT_415798	CDV56_107009
NR-PKS	Afu2g17600	NFIA_093000	Alt_000061-T1	Aud_001739-T1	Avi_000055-T1	Aps_008390-T1	CNMCM6805_003166	P174DRAFT_448094	CDV56_104323	pksP	DHN-melanin
HR-PKS	Afu3g01410	NFIA_002360	Alt_004732-T1	Aud_002495-T1	Avi_009495-T1	Aps_005601-T1	CNMCM6805_006877	P174DRAFT_396977	CDV56_100578
NRPS	Afu3g03350	NFIA_005520	Alt_004462-T1	Aud_002754-T1	Avi_009272-T1	Aps_005965-T1	CNMCM6805_002201	P174DRAFT_374431	CDV56_105784	sidE	Fumarylalanine?
NRPS-like	Afu5g10120	NFIA_077170	Alt_005864-T1	Aud_005878-T1	Avi_004093-T1	Aps_004816-T1	CNMCM6805_003845	P174DRAFT_439078	CDV56_107737
NRPS	Afu6g09660	NFIA_055350	Alt_006934-T1	Aud_004523-T1	Avi_009659-T1	Aps_010850-T1	CNMCM6805_006937	P174DRAFT_511160	CDV56_101444	gliP	Gliotoxin
NR-PKS	Afu7g00160	NFIA_112240	Alt_000013-T1	Aud_002472-T1	Avi_003364-T1	Aps_000014-T1	CNMCM6805_003223	P174DRAFT_454886	CDV56_104694	nscA/fccA	Neosartoricin/fumicycline A
PR-PKS	Afu8g02350	NFIA_096030	Alt_009401-T1	Aud_008986-T1	Avi_002400-T1	Aps_009820-T1	CNMCM6805_005914	P174DRAFT_377165	CDV56_105860
NRPS	Afu3g12920	NFIA_064400	Alt_003621-T1	Aud_003577-T1	Avi_005753-T1	Aps_006813-T1	CNMCM6805_010146	P174DRAFT_446394		hasD	Hexadehydroastechrome
NRPS-like	Afu6g08560	NFIA_054210	Alt_007044-T1	Aud_004647-T1	Avi_002682-T1	Aps_008587-T1		P174DRAFT_511255	CDV56_102664
HR-PKS	Afu3g14700	NFIA_062550	Alt_006152-T1	Aud_000154-T1	Avi_008100-T1		CNMCM6805_000309	P174DRAFT_446206	CDV56_102883
NRPS	Afu3g03420	NFIA_005590	Alt_004454-T1	Aud_002763-T1		Aps_005990-T1	CNMCM6805_000684	P174DRAFT_505534	CDV56_103512	sidD	Fusarinine C, triacetylfusarinine C
NRPS	Afu3g15270	NFIA_061820	Alt_003384-T1	Aud_003833-T1		Aps_007050-T1	CNMCM6805_009446	P174DRAFT_435834		ftpA	Fumaryl-phenylalanine, -tyrosine
NR-PKS	Afu4g14560	NFIA_101810	Alt_008896-T1	Aud_006884-T1		Aps_000087-T1	CNMCM6805_002406	P174DRAFT_460908		tpcC	Trypacidin
HR-PKS		NFIA_057360	Alt_006730-T1	Aud_004232-T1	Avi_009883-T1	Aps_011090-T1	CNMCM6805_009286	P174DRAFT_480720
NRPS-like	Afu6g03480	NFIA_007580	Alt_010303-T1	Aud_006839-T1		Aps_010129-T1	CNMCM6805_006589			fsqF	Fumisoquins
NRPS-like	Afu8g01640	NFIA_095200	Alt_009481-T1	Aud_008870-T1			CNMCM6805_002089	P174DRAFT_377555
NRPS-like	Afu3g02670	NFIA_004100	Alt_004555-T1		Avi_009740-T1	Aps_010942-T1			CDV56_101036
HR-PKS	Afu8g00370			Aud_008722-T1	Avi_002196-T1	Aps_010081-T1	CNMCM6805_005828	P174DRAFT_424178		fma-PKS	Fumagilin
HR-PKS		NFIA_004080	Alt_004572-T1	Aud_005467-T1		Aps_005781-T1	CNMCM6805_009620	P174DRAFT_516120
NRPS		NFIA_101940		Aud_006872-T1	Avi_006983-T1	Aps_000076-T1	CNMCM6805_002395	P174DRAFT_512950
PR-PKS	Afu6g13930	NFIA_100520	Alt_007475-T1				CNMCM6805_009367		CDV56_106847	pyr2	Pyripyropene A
NRPS	Afu8g00170	NFIA_093690			Avi_002834-T1	Aps_009294-T1	CNMCM6805_002581			ftmA	FumitremorginS
Hybrid	Afu8g00540			Aud_008738-T1		Aps_010065-T1	CNMCM6805_005843	P174DRAFT_434415		psoA	Pseurotin
NR-PKS			Alt_008389-T1	Aud_000136-T1	Avi_001657-T1	Aps_001607-T1	CNMCM6805_004785
NRPS			Alt_010479-T1		Avi_003357-T1	Aps_001774-T1	CNMCM6805_002005		CDV56_104931
PR-PKS		NFIA_093790	Alt_009665-T1				CNMCM6805_005814	P174DRAFT_424163
NR-PKS		NFIA_101660	Alt_008912-T1				CNMCM6805_002418	P174DRAFT_487776		(nsrB)	Neosartorin
PR-PKS			Alt_001717-T1	Aud_006764-T1			CNMCM6805_000141	P174DRAFT_508179
PR-PKS			Alt_003389-T1	Aud_009528-T1			CNMCM6805_009442		CDV56_100464
Hybrid			Alt_004810-T1			Aps_010138-T1	CNMCM6805_001048	P174DRAFT_448608
NRPS				Aud_003872-T1	Avi_003177-T1			P174DRAFT_380384	CDV56_103361
NR-PKS	Afu4g00210	NFIA_045430						P174DRAFT_471308		encA	Endochrocin
HR-PKS	Afu1g17740				Avi_007034-T1				CDV56_103006
NRPS		NFIA_044240		Aud_004261-T1		Aps_003861-T1
NR-PKS		NFIA_003740				Aps_003457-T1	CNMCM6805_001718
NRPS			Alt_000084-T1	Aud_007785-T1				P174DRAFT_450899
PR-PKS			Alt_007763-T1				CNMCM6805_006598	P174DRAFT_426064		(terA)	Terrein
NRPS			Alt_009670-T1				CNMCM6805_005825	P174DRAFT_506779
HR-PKS			Alt_010326-T1				CNMCM6805_001839	P174DRAFT_435620
NRPS			Alt_009775-T1				CNMCM6805_005348		CDV56_102390
NR-PKS				Aud_005392-T1	Avi_003616-T1	Aps_005338-T1				(vdtA)	Viriditoxin
PR-PKS				Aud_008854-T1	Avi_003269-T1	Aps_009948-T1
PKS-like				Aud_008733-T1	Avi_002209-T1	Aps_010070-T1
PR-PKS				Aud_009571-T1	Avi_008468-T1	Aps_010803-T1
NRPS				Aud_001404-T1	Avi_000390-T1		CNMCM6805_008266
HR-PKS				Aud_001772-T1	Avi_000019-T1		CNMCM6805_003206
PR-PKS				Aud_002047-T1	Avi_005973-T1			P174DRAFT_502755
Hybrid				Aud_002531-T1			CNMCM6805_002741		CDV56_104935
PR-PKS	Afu1g01010							P174DRAFT_480645		fgnA	Fumigermin
NRPS	Afu6g12080								CDV56_102079	fmqA	Fumiquinazolines
NRPS-like		NFIA_005280	Alt_009484-T1
NRPS-like		NFIA_045590		Aud_004183-T1
NRPS		NFIA_062250		Aud_010229-T1
HR-PKS		NFIA_023490				Aps_006001-T1
HR-PKS		NFIA_073990				Aps_007719_T1
NRPS		NFIA_074300					CNMCM6805_000322
NRPS		NFIA_055290						P174DRAFT_404104		(anaPS)	Acetylaszonalenin
NRPS			Alt_003096-T1	Aud_010682-T1
NRPS			Alt_010246-T1	Aud_010114-T1
HR-PKS			Alt_000119-T1				CNMCM6805_002152
NRPS			Alt_006549-T1				CNMCM6805_005080
PKS-like			Alt_007762-T1				CNMCM6805_006599	P174DRAFT_508212		(terB)	Terrein
Hybrid			Alt_010411-T1				CNMCM6805_004330			(cpaA)	Cyclopiazonic acid
HR-PKS			Alt_009842-T1					P174DRAFT_515476
NR-PKS				Aud_006246-T1	Avi_007494-T1
NRPS				Aud_000066-T1			CNMCM6805_001986
NRPS				Aud_000067-T1			CNMCM6805_001987
HR-PKS				Aud_001781-T1			CNMCM6805_003215
Hybrid				Aud_002647-T1			CNMCM6805_003243
NRPS				Aud_004404-T1			CNMCM6805_008968
HR-PKS				Aud_007428-T1			CNMCM6805_003551
HR-PKS				Aud_008949-T1				P174DRAFT_422527
NRPS				Aud_009335-T1					CDV56_105202
NRPS-like					Avi_003254-T1	Aps_001888-T1
PR-PKS					Avi_003638-T1	Aps_005292-T1
NRPS-like					Avi_006016-T1	Aps_001680-T1
NRPS					Avi_009131-T1	Aps_002103-T1
NR-PKS					Avi_010194-T1		CNMCM6805_004949
HR-PKS						Aps_010384-T1	CNMCM6805_006456
NRPS							CNMCM6805_003530	P174DRAFT_471730
NRPS							CNMCM6805_004607	P174DRAFT_458446
NRPS							CNMCM6805_004764	P174DRAFT_455269
PKS-like	Afu3g02530
NR-PKS	Afu3g02570
NRPS	Afu3g13730									pesG
NRPS	Afu5g12730									pes3
NRPS	Afu6g09610									pesJ
NRPS	Afu6g12050									fmgC	Fumiquinazolines
PKS-like	Afu8g00490
Hybrid		NFIA_001530
NRPS		NFIA_029990
NRPS		NFIA_031170
NRPS		NFIA_043670
NRPS		NFIA_057960
NRPS		NFIA_057990
NRPS		NFIA_058030
HR-PKS		NFIA_093910
NRPS		NFIA_100270
NRPS		NFIA_100310
NRPS			Alt_001916-T1
NRPS			Alt_003117-T1
Hybrid			Alt_004920-T1
NR-PKS			Alt_007499-T1
PKS-like				Aud_000022-T1
HR-PKS				Aud_000025-T1
NRPS				Aud_000111-T1
PKS-like				Aud_000124-T1
PKS-like				Aud_001101-T1
PR-PKS				Aud_002590-T1
NRPS				Aud_003828-T1
PR-PKS				Aud_003849-T1
NR-PKS				Aud_004204-T1
NRPS-like				Aud_007403-T1
NRPS-like				Aud_007405-T1
PR-PKS				Aud_007778-T1
HR-PKS				Aud_009289-T1
HR-PKS				Aud_009511-T1
NR-PKS				Aud_009514-T1
NRPS				Aud_009532-T1
HR-PKS				Aud_009535-T1
NRPS				Aud_010225-T1
PR-PKS					Avi_000001-T1
Hybrid					Avi_001747-T1
HR-PKS					Avi_001988-T1
PKS-like					Avi_002209-T1
HR-PKS					Avi_004012-T1
HR-PKS					Avi_006058-T1
Hybrid					Avi_007785-T1
NRPS					Avi_007877-T1
NR-PKS					Avi_008488-T1
NRPS-like					Avi_009175-T1
NR-PKS					Avi_009488-T1
NRPS					Avi_009654-T1
NRPS					Avi_010141-T1
NRPS					Avi_010188-T1
NR-PKS						Aps_000054-T1
HR-PKS						Aps_000652-T1
NRPS						Aps_001635-T1
PR-PKS						Aps_001646-T1
Hybrid						Aps_001706-T1
NRPS						Aps_001713-T1
NRPS						Aps_001727-T1
NRPS						Aps_001729-T1
NRPS-like						Aps_001803-T1
Hybrid						Aps_001983-T1
NRPS						Aps_002064-T1
NRPS						Aps_002069-T1
NRPS						Aps_002070-T1
NRPS						Aps_003434-T1
NRPS						Aps_003435-T1
HR-PKS						Aps_003754-T1
NRPS						Aps_003759-T1
HR-PKS						Aps_003852-T1
PR-PKS						Aps_005313-T1
NRPS						Aps_005329-T1
NRPS						Aps_005352-T1
PR-PKS						Aps_005369-T1
NRPS						Aps_005379-T1
NRPS						Aps_005386-T1
PR-PKS						Aps_005387-T1
NRPS						Aps_005489-T1
Hybrid						Aps_005641-T1
NR-PKS						Aps_005676-T1
HR-PKS						Aps_005677-T1
NRPS						Aps_005927-T1
HR-PKS						Aps_007009-T1
NRPS						Aps_007072-T1
NRPS						Aps_007102-T1
HR-PKS						Aps_009301-T1
NR-PKS						Aps_009365-T1
HR-PKS						Aps_009369-T1
HR-PKS						Aps_009436-T1
NRPS-like						Aps_009509-T1
NR-PKS						Aps_010388-T1
NRPS						Aps_010820-T1
HR-PKS						Aps_011450-T1
NRPS-like							CNMCM6805_000252
NRPS							CNMCM6805_001041
NRPS							CNMCM6805_001164
HR-PKS							CNMCM6805_001725
NRPS							CNMCM6805_001730
NRPS							CNMCM6805_002015
NRPS							CNMCM6805_002016
NRPS							CNMCM6805_002144
NRPS							CNMCM6805_002145
NRPS							CNMCM6805_002146
NRPS							CNMCM6805_002147
NRPS							CNMCM6805_002150
NRPS-like							CNMCM6805_002444
NRPS							CNMCM6805_002859
NRPS-like							CNMCM6805_002870
NRPS							CNMCM6805_003246
NRPS-like							CNMCM6805_004012
NRPS							CNMCM6805_004133
NRPS							CNMCM6805_004627
NRPS							CNMCM6805_004955
NRPS							CNMCM6805_005813
HR-PKS							CNMCM6805_006275
NR-PKS							CNMCM6805_006453
NRPS							CNMCM6805_008633
NRPS							CNMCM6805_008857
NRPS-like							CNMCM6805_009264
PR-PKS							CNMCM6805_009265
NRPS-like							CNMCM6805_009627
NRPS							CNMCM6805_010247
NRPS								P174DRAFT_449186
NR-PKS								P174DRAFT_414130
HR-PKS								P174DRAFT_418770
NRPS								P174DRAFT_425495
NRPS								P174DRAFT_425623
NRPS								P174DRAFT_454137
Hybrid								P174DRAFT_454988
PR-PKS								P174DRAFT_455569		(nvfA)	Novofumigatonin
HR-PKS								P174DRAFT_458175
NRPS								P174DRAFT_458966
NRPS								P174DRAFT_507323
Hybrid								P174DRAFT_507550
Hybrid								P174DRAFT_507588
NR-PKS								P174DRAFT_509493
PR-PKS								P174DRAFT_510672
HR-PKS								P174DRAFT_515935
NRPS									CDV56_107254
NR-PKS									CDV56_100457
PR-PKS									CDV56_100471
HR-PKS									CDV56_100969
Hybrid									CDV56_101092
NR-PKS									CDV56_101535
NRPS-like									CDV56_101753
Hybrid									CDV56_102026
NRPS									CDV56_102363
NR-PKS									CDV56_102428
HR-PKS									CDV56_102872
NRPS-like									CDV56_103323
HR-PKS									CDV56_103490
NRPS									CDV56_103550
NRPS									CDV56_104151
NR-PKS									CDV56_104489
NRPS-like									CDV56_106067
HR-PKS									CDV56_107115
NRPS									CDV56_107385
Hybrid									CDV56_108187
NR-PKS									CDV56_108208
HR-PKS									CDV56_109033
NRPS									CDV56_109100
*HR: hyghly reduced; PR: partly reduced; NR: non-reduced
