# Supplementary material for: Interspecies Genomic Variation and Transcriptional Activeness of Secondary Metabolism-Related Genes in Aspergillus Section Fumigati
Source: Front Fungal Biol. 2021 Apr 16;2:656751. doi: 10.3389/ffunb.2021.656751 (PMC10512231; doi:10.3389/ffunb.2021.656751)
Supplement: Supplementary Table 9 — Comparison of ter cluster between A. lentulus and A. terreus. [file Table_9.xlsx]

## Sheet: Sheet1
Table S9, Comparison of ter cluster between A. lentulus and A. terreus
	A. lentulus			A. terreus
Gene name	Gene ID	AA length		Gene ID	AA length		% identity (BLAST P)
terA	Alt_007763	2160		ATEG_00145	2081		91.5
terB	Alt_007762	1107		ATEG_00144	952		90.4
terC	Alt_007761	356		ATEG_00143	372		93.5
terD	Alt_007760	623		ATEG_00142	614		94.3
terE	Alt_007759	474		ATEG_00141	536		95.6
terF	Alt_007758.2	435		ATEG_00140	459		94
terR	Alt_007758.1	713		ATEG_00139	638		87.1
terG	Alt_007757	534		ATEG_00138	531		94.6
terH	Alt_007755	340		ATEG_00137	340		97.6
terI	Alt_007754	196		ATEG_00136	197		95.9
terJ	Alt_007753	414		ATEG_00135	518		96.6
